# Supplementary material for: Novel Antimicrobial Peptides Designed Using a Recurrent Neural Network Reduce Mortality in Experimental Sepsis
Source: MDPI journal article supplement (doi:10.3390/antibiotics11030411), 2022-03-18

Table S1. MIC values calculations against *K. aerogenes*.

| isolate #           | PEP-38 — 1st MIC | PEP-38 — 2nd MIC | PEP-38 — 3rd MIC | Media n PEP-38 MIC |  | PEP-138 — 1st MIC | PEP-138 — 2nd MIC | PEP-138 — 3rd MIC | Media n PEP-138 MIC |
|---------------------|------------------|------------------|------------------|--------------------|--|-------------------|-------------------|-------------------|---------------------|
| 1                   | 16               | 16               | 8                | 16                 |  | 2                 | 2                 | 1                 | 2                   |
| 2                   | 2                | 4                | 4                | 4                  |  | 0,5               | 0,5               | 1                 | 0,5                 |
| 3                   | 8                | 16               | 8                | 8                  |  | 2                 | 1                 | 1                 | 1                   |
| 4                   | 4                | 4                | 2                | 4                  |  | 0,5               | 1                 | 1                 | 1                   |
| 5                   | 16               | 8                | 16               | 16                 |  | 1                 | 1                 | 2                 | 1                   |
| 6                   | 8                | 8                | 8                | 8                  |  | 2                 | 4                 | 4                 | 4                   |
| 7                   | 2                | 2                | 4                | 2                  |  | 2                 | 4                 | 2                 | 2                   |
| 8                   | 8                | 8                | 8                | 8                  |  | 2                 | 2                 | 2                 | 2                   |
| 9                   | 8                | 4                | 4                | 4                  |  | 2                 | 2                 | 2                 | 2                   |
| 10                  | 8                | 8                | 8                | 8                  |  | 4                 | 4                 | 2                 | 4                   |
| 11                  | 4                | 2                | 4                | 4                  |  | 0,5               | 2                 | 2                 | 2                   |
| 12                  | 4                | 4                | 4                | 4                  |  | 4                 | 8                 | 4                 | 4                   |
| Median              |                  |                  |                  | 6                  |  |                   |                   |                   | 2                   |
| First quartile (25) |                  |                  |                  | 4                  |  |                   |                   |                   | 1                   |
| Third quartile (75) |                  |                  |                  | 8                  |  |                   |                   |                   | 2,5                 |

Table S2. MIC values calculations against *K. pneumoniae*.

| isolate # | PEP-38 — 1st MIC | PEP-38 — 2nd MIC | PEP-38 — 3rd MIC | Media n PEP-38 MIC |  | PEP-138 — 1st MIC | PEP-138 — 2nd MIC | PEP-138 — 3rd MIC | Media n PEP-138 MIC |
|-----------|------------------|------------------|------------------|--------------------|--|-------------------|-------------------|-------------------|---------------------|
| 1         | 8                | 32               | 16               | 16                 |  | 4                 | 2                 | 4                 | 4                   |
| 2         | 8                | 8                | 8                | 8                  |  | 2                 | 1                 | 1                 | 1                   |
| 3         | 4                | 8                | 8                | 8                  |  | 1                 | 1                 | 1                 | 1                   |
| 4         | 2                | 4                | 4                | 4                  |  | 1                 | 1                 | 1                 | 1                   |
| 5         | 4                | 4                | 4                | 4                  |  | 0,5               | 1                 | 1                 | 1                   |
| 6         | 4                | 4                | 4                | 4                  |  | 2                 | 1                 | 1                 | 1                   |
| 7         | 4                | 4                | 4                | 4                  |  | 4                 | 4                 | 2                 | 4                   |
| 8         | 4                | 4                | 8                | 4                  |  | 4                 | 4                 | 4                 | 4                   |
| 9         | 8                | 8                | 8                | 8                  |  | 2                 | 2                 | 2                 | 2                   |
| 10        | 16               | 32               | 32               | 32                 |  | 8                 | 4                 | 8                 | 8                   |



|                     |  |  |  |  |  |  |  |  |   |
|---------------------|--|--|--|--|--|--|--|--|---|
| First quartile (25) |  |  |  |  |  |  |  |  | 2 |
| Third quartile (75) |  |  |  |  |  |  |  |  | 4 |

<sup>a</sup> R – resistant to 32 µg/ml of PEP-38.

Table S4. Survival proportions (%) in all experimental animal groups.

| Days after infecting | Control (n=12) | PEP-36 (n=12) | PEP-38 (n=12) | PEP-137 (n=12) |
|----------------------|----------------|---------------|---------------|----------------|
| 0                    | 100            | 100           | 100           | 100            |
| 1                    | 66,7           | 91,7          | 66,7          | 91,7           |
| 2                    | 16,7           | 75            | 41,7          | 66,7           |
| 3                    | 0              | 66,7          | 8,3           | 50             |
| 5                    |                | 66,7          | 8,3           | 50             |

Figure S1. Probability of survival: control vs PEP-36.

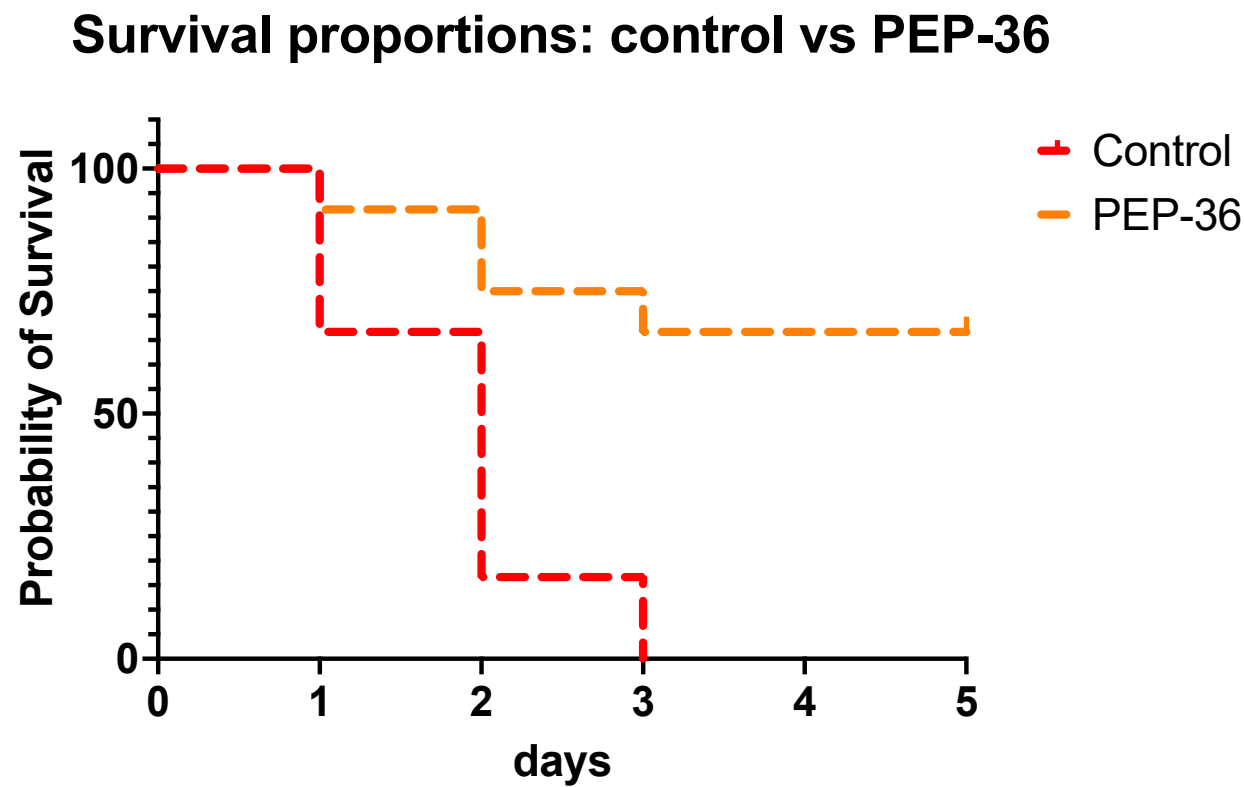

Figure S2. Probability of survival: control vs PEP-38.

### Survival proportions: control vs PEP-38

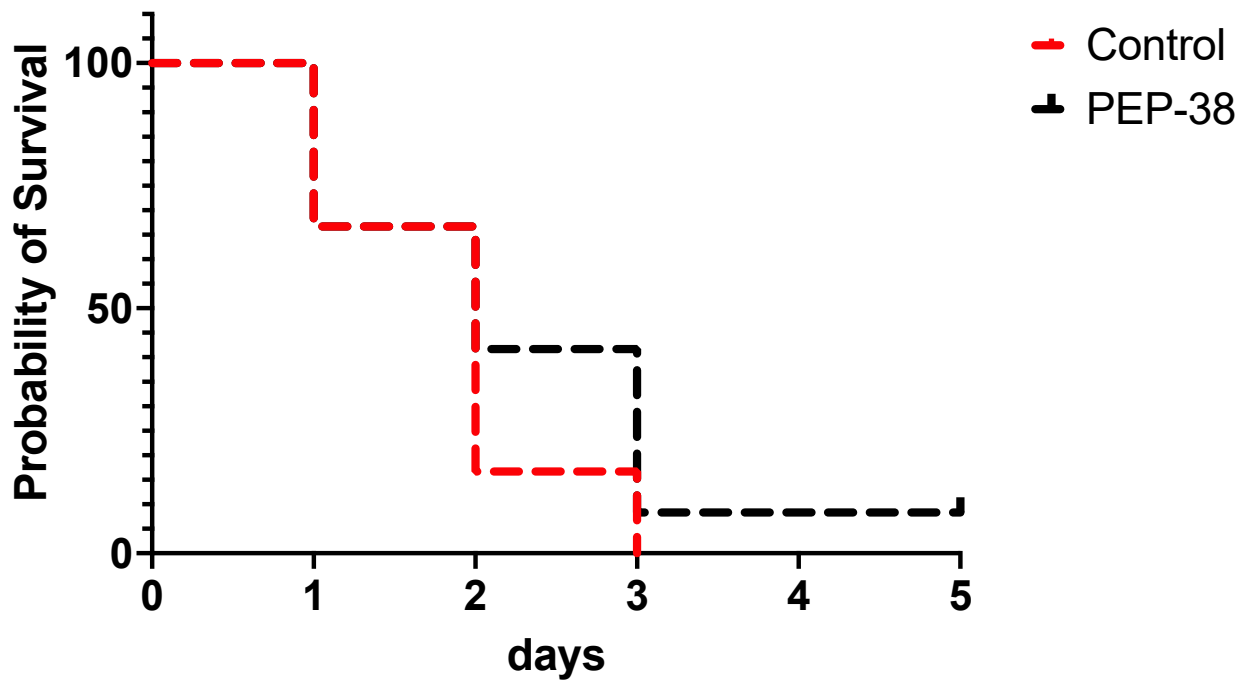

Figure S3. Probability of survival: control vs PEP-137.

### Survival proportions: control vs PEP-137

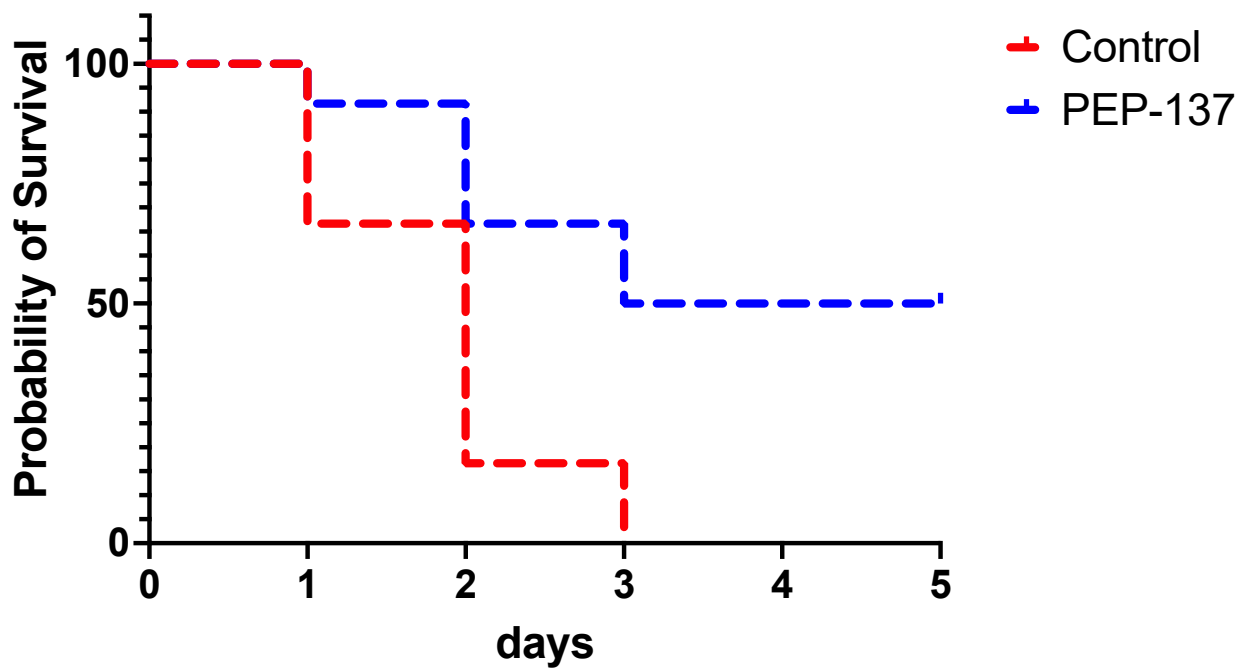

Figure S4. Time evolution of root mean squared deviation (RMSD) of peptides (A) and membrane (B) throughout the MD simulation.

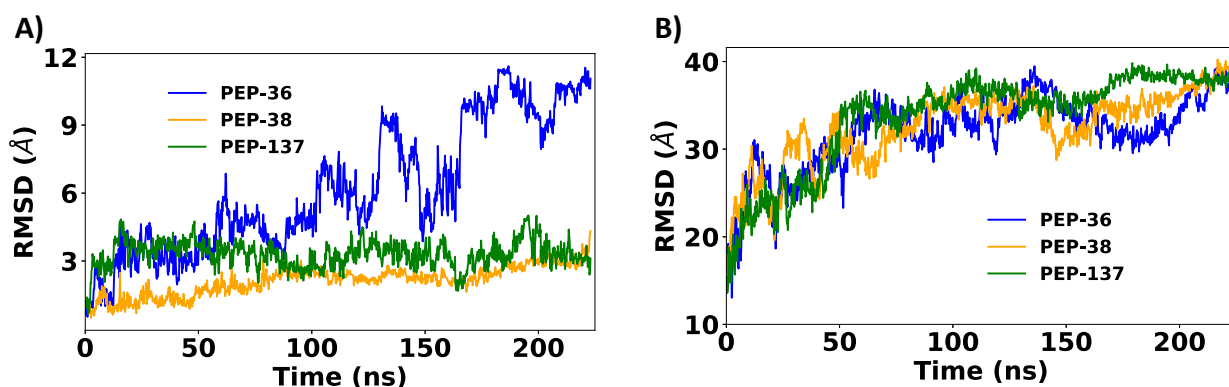

Figure S5. Percentage of hydrogen bonding between peptide residues and membrane averaged over the last 50ns. Color scheme: hydrogen bonds with backbone CO (red), backbone NH (blue), and sidechain (SC) (green).

To identify the important amino acids crucial for interaction with bacterial membrane, we calculated the percentage of hydrogen bonding between peptide residues and membrane averaged over the last 50ns and is plotted in Figure S5. It was shown that for all three peptides the side chain (green bar) of amino acids are main contributor to the h-bond with the lipid molecule. Most of these amino acids are lysine.

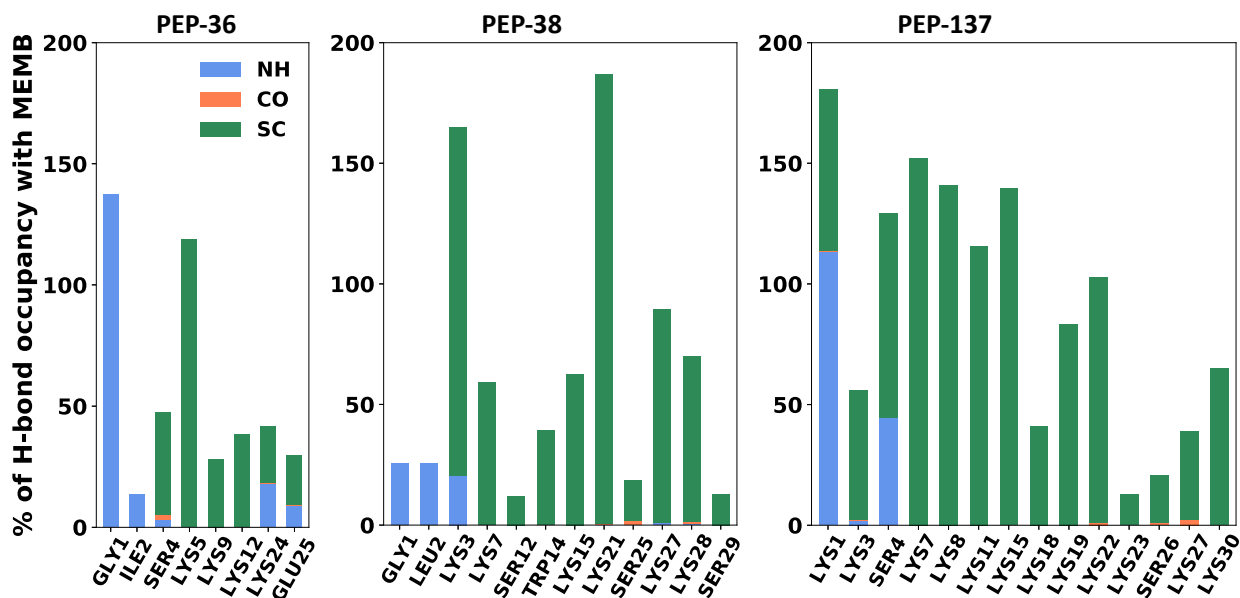

Supplement: s1 [file s1]
